# Supplementary material
Source: PubMed Central journal article supplement (PMC5501958)
Supplement: NIHMS870048-supplement.pdf [file NIHMS870048-supplement.pdf]

# Smoking Cessation App Program Components

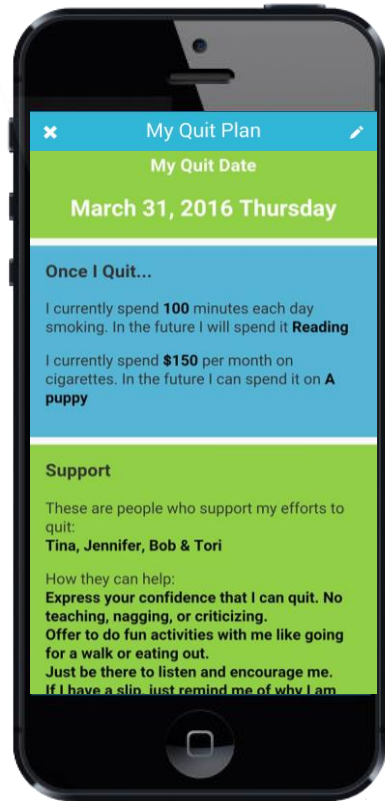

1. Create Quit Plan

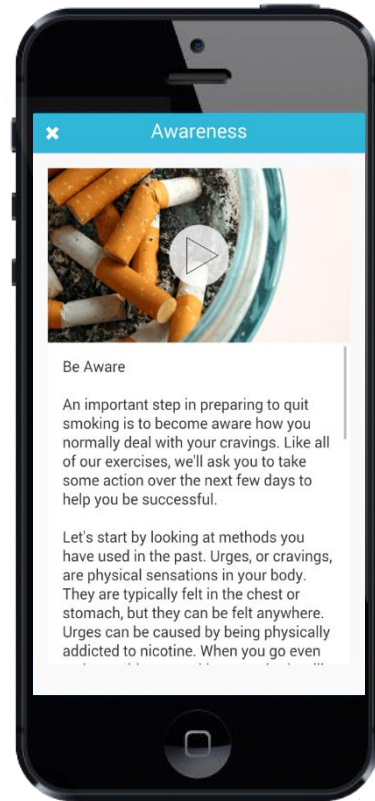

2. Complete 8 Daily ACT Modules

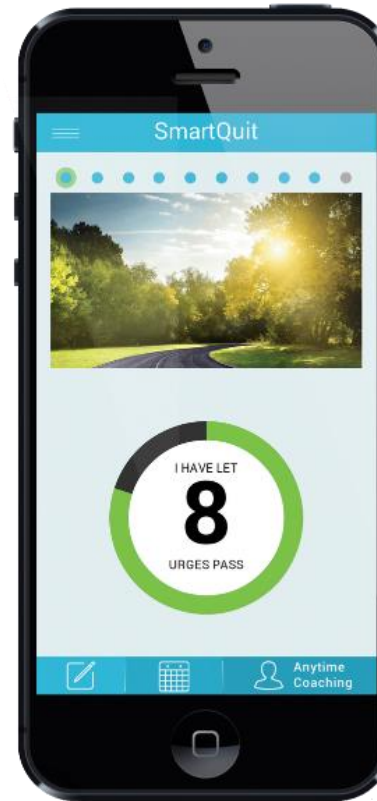

3. Track Letting at least 10 Urges Pass

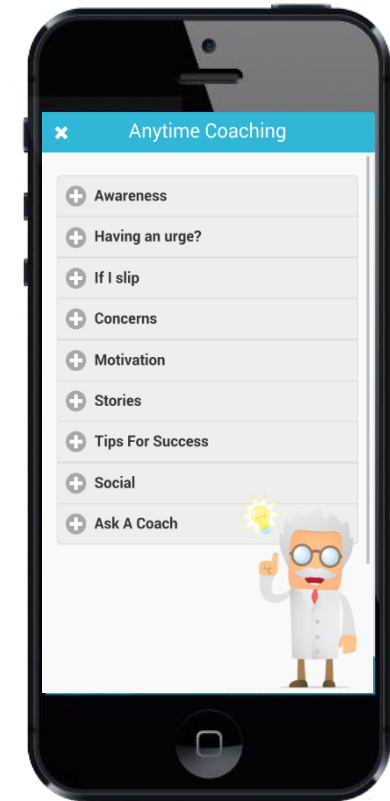

4. Visit Anytime Coaching at least once
